# Supplementary material
Source: Springer Nature journal article supplement (https://www.springermedizin.de/resource/supplementary/12883_2008_226_MOESM3_ESM.pdf/9457114)

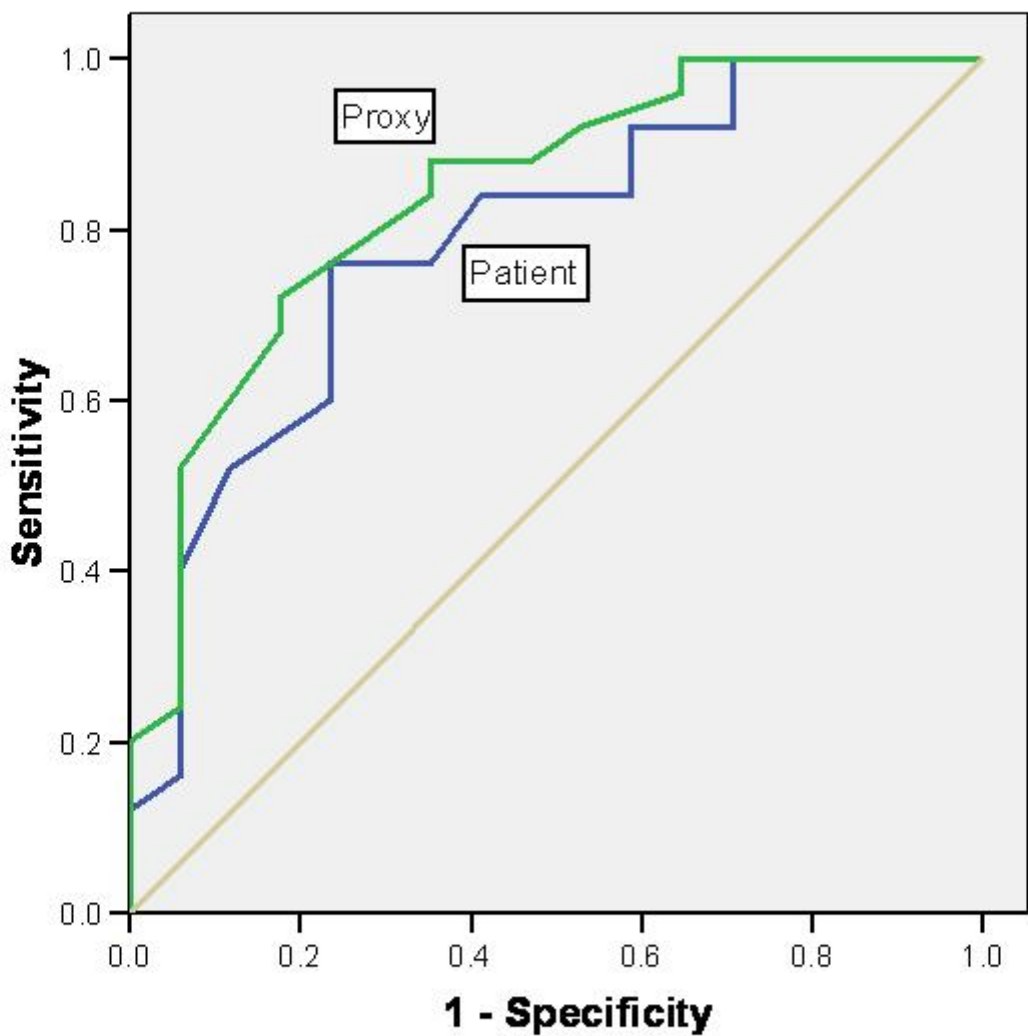

Supplement: MOESM3 [file 9457114]
